# Supplementary material for: Surface reconstruction of NiCoP for enhanced biomass upgrading
Source: Royal Society of Chemistry journal article supplement (doi:10.1039/d1ta05425b), 2021-01-01
Supplement: d1ta05425b1.pdf [file d1ta05425b1.pdf]

Electronic Supplementary Material (ESI) for Journal of Materials Chemistry A. This  
journal is © The Royal Society of Chemistry 2021

## Supporting Information

### Surface Reconstruction of NiCoP for Enhanced Biomass Upgrading

Honglei Wang, Chong Li, Jintao An, Yuan Zhuang, and Shengyang Tao\*

Department of Chemistry, School of Chemical Engineering, Dalian University of Technology,  
Dalian 116024, China.

#### Supplementary Figures and Tables

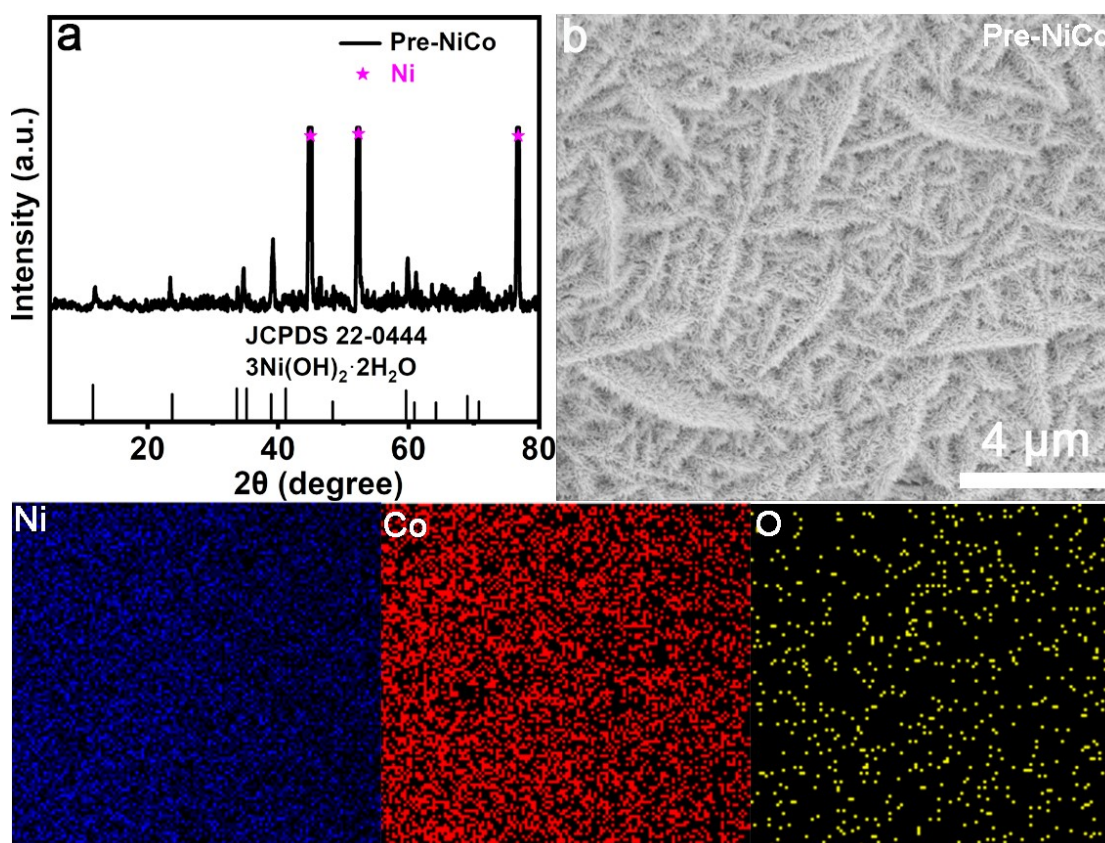

**Fig. S1.** (a) The XRD patterns of Pre-NiCo and (b) the SEM images and corresponding elements mapping for Pre-NiCo.

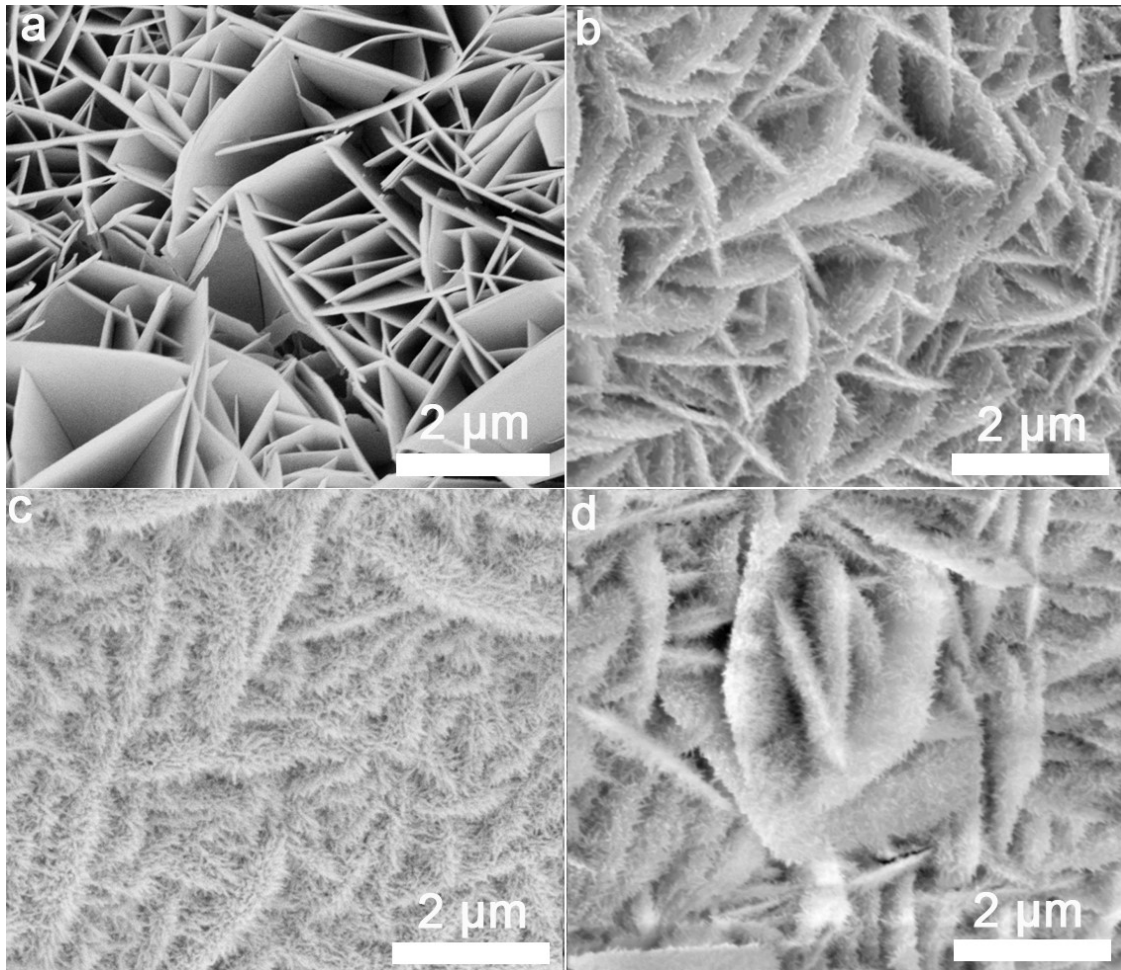

**Fig. S2.** Microscopy measurements of the Pre-NiCo at different reaction time with the same reaction temperature of 87 °C. SEM images of Pre-NiCo prepared at different reaction time (5 h (a), 10 h (b), 15 h (c), and 20 h (d)).

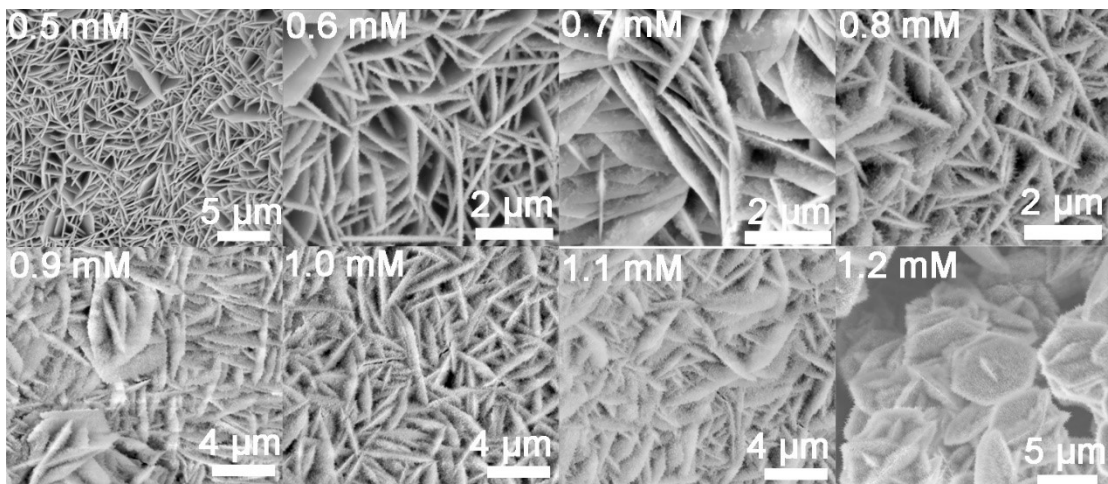

**Fig. S3.** SEM images of Pre-NiCo with different Co salts content under the same other conditions.

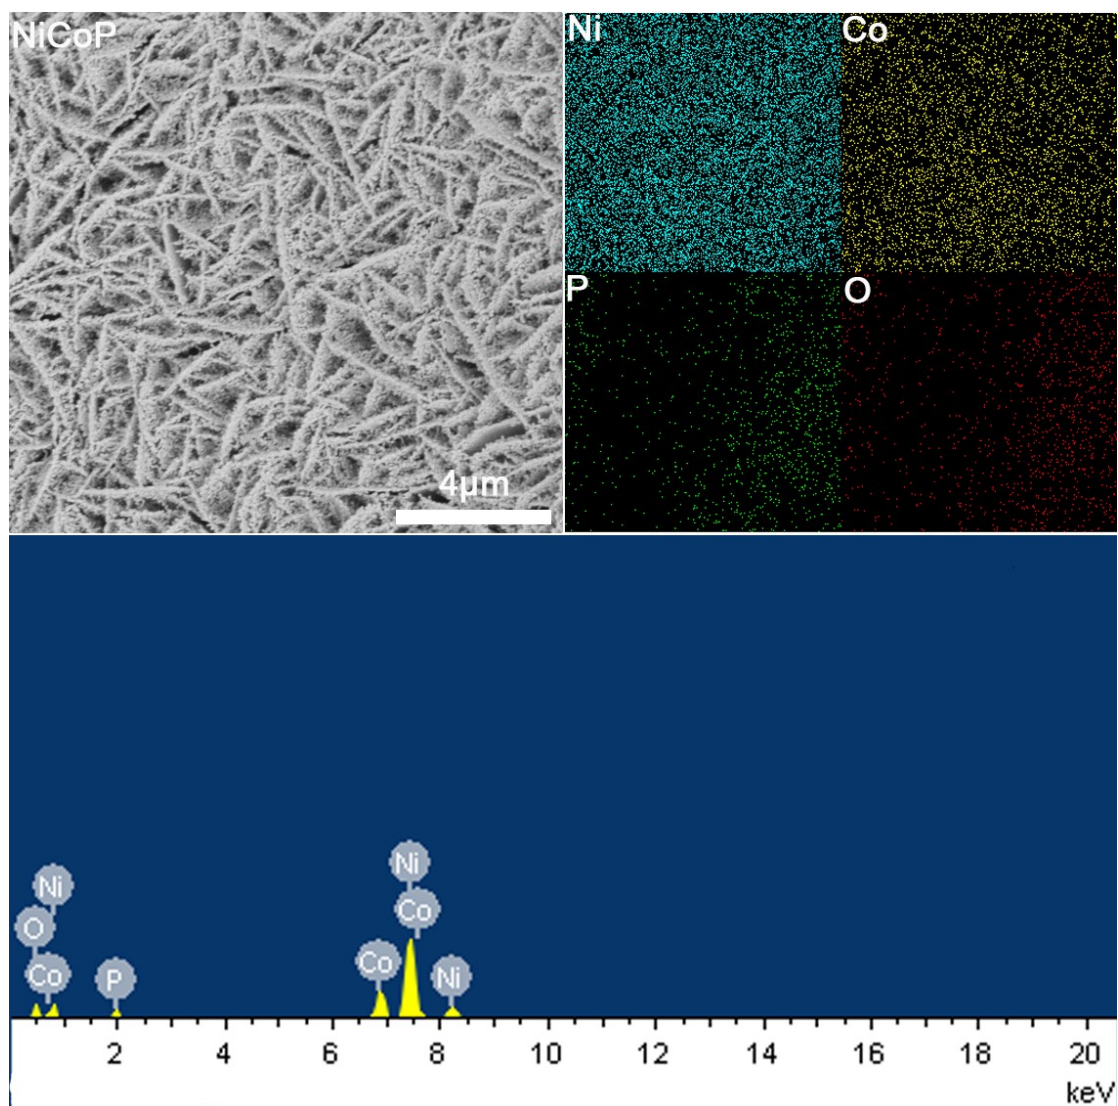

**Fig. S4.** The SEM images elements mapping and EDS of NiCoP.

**Table S1.** The mass percentage and atomic percentage of elements in NiCoP catalyst.

| Elements | Mass ratio | Atomic |
|----------|------------|--------|
| O        | 21.76      | 46.18  |
| P        | 16.65      | 18.25  |
| Co       | 14.87      | 8.57   |
| Ni       | 46.71      | 27.01  |
| Total    | 100        |        |



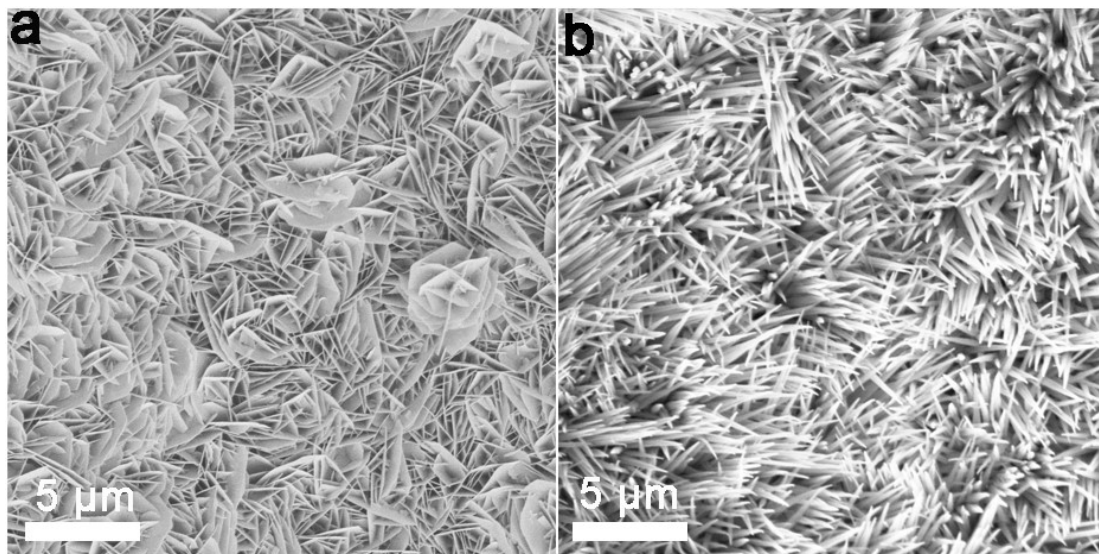

Fig. S5. The SEM images of Ni<sub>2</sub>P (a) and (b) CoP.

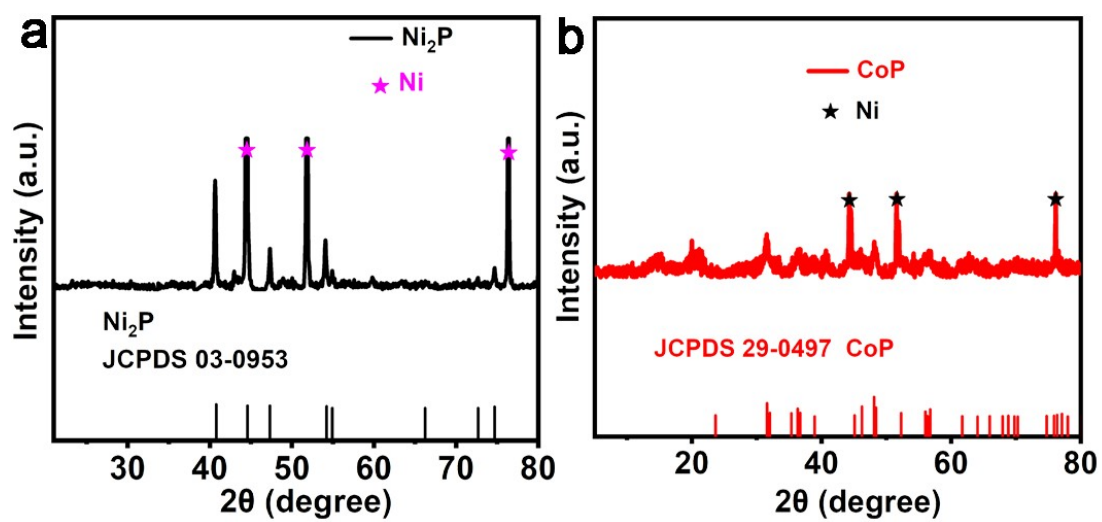

Fig. S6. The XRD patterns of Ni<sub>2</sub>P (a) and (b) CoP.

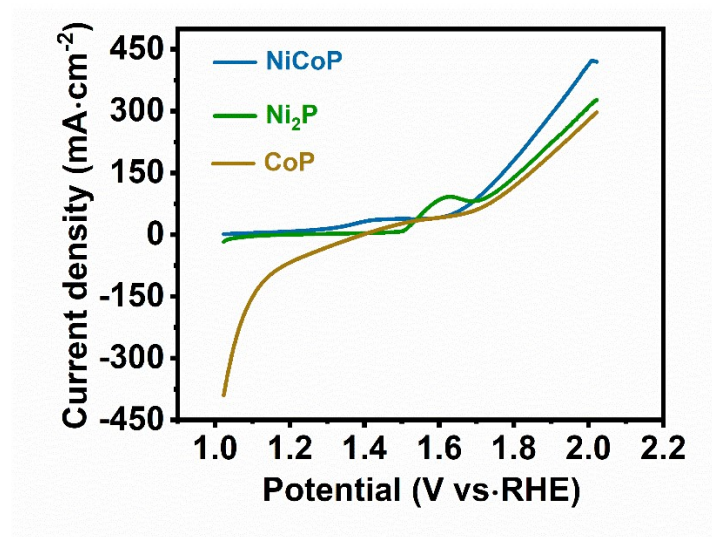

**Fig. S7.** The LSV curves of NiCoP, Ni<sub>2</sub>P, and CoP at 1.0 M KOH.

**Table S2.** Comparison HMFOR performance of NiCoP with other electrocatalysts in 1.0 M KOH with 300 mM HMF.

| Samples                               | Oxidation voltage (V vs RHE) | HMF Conversion (%) | FDCA Selectivity (%) | Faraday efficiency (%) | HMF concentration (mM) | Reference        |
|---------------------------------------|------------------------------|--------------------|----------------------|------------------------|------------------------|------------------|
| NiOOH                                 | 1.47                         | 99.8               | 95.8                 | 96.0                   | 5.0                    | 1                |
| MoO <sub>2</sub> - FeP@C              | 1.45                         | 99.4               | 98.6                 | 97.8                   | 10                     | 2                |
| NiSe@NiO <sub>x</sub> /NF             | 1.35 (onset)                 | 99.0               | 98.0                 | 98.0                   | 10                     | 3                |
| Ni <sub>3</sub> N@C/NF                | 1.38                         | 99.0               | 98.0                 | 99.0                   | 10                     | 4                |
| Co-P                                  | 1.44                         | ~100               | 90.0                 | ~90.0                  | 50                     | 5                |
| NiCo <sub>2</sub> O <sub>4</sub>      | 1.50                         | 90.4               | 90.8                 | 87.5                   | 5.0                    | 6                |
| VN/NiF                                | 1.36                         | 98                 | 96                   | 84                     | 10                     | 7                |
| MnO <sub>x</sub>                      | 1.6                          | 99.9               | 53.8                 | 33.8                   | 20                     | 8                |
| CuCo <sub>2</sub> O                   | 1.45                         | ~100               | 93.7                 | 94                     | 50                     | 9                |
| CoNiFe LDH                            | 1.55                         | 95.5               | 84.9                 | ~90.0                  | 10                     | 10               |
| om-Co <sub>3</sub> O <sub>4</sub> /NF | 1.457                        | ~100               | 99.8                 | ~100                   | 10                     | 11               |
| (PdAu) <sub>7</sub>                   | 0.82                         | ~                  | 17.5                 | 85.8                   | 10                     | 12               |
| <b>NiCoP</b>                          | <b>1.464</b>                 | <b>99.8</b>        | <b>99.6</b>          | <b>96.1</b>            | <b>300</b>             | <b>This work</b> |

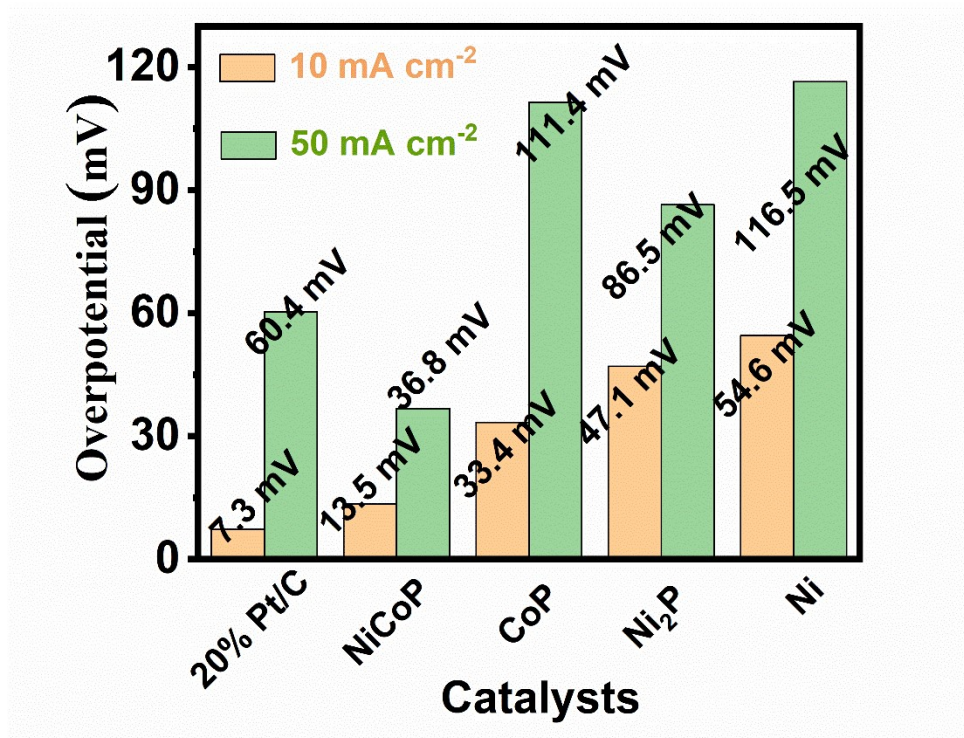

**Fig. S8.** The hydrogen evolution overpotential of 20% Pt/C, NiCoP, Ni<sub>2</sub>P, CoP, and Ni with different current densities.

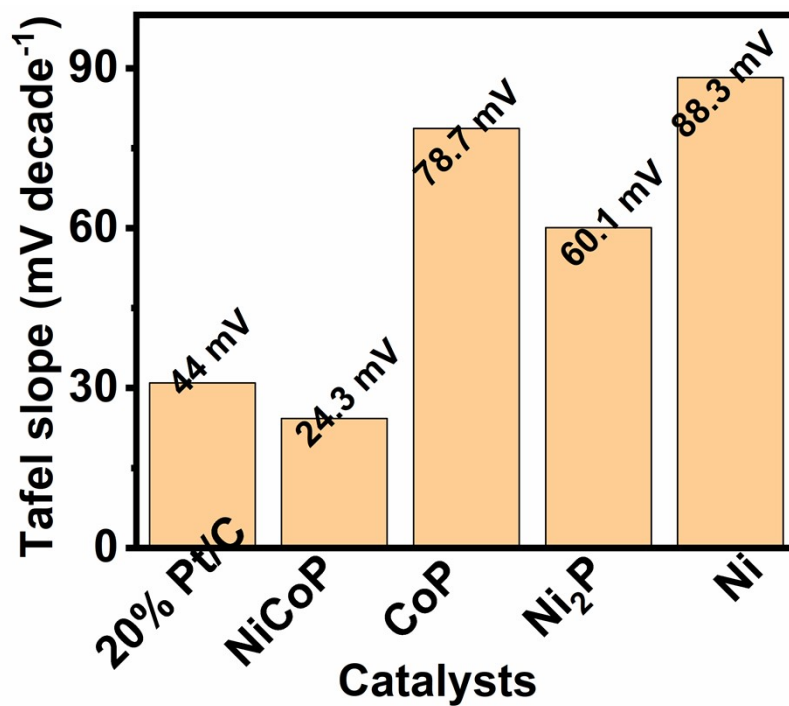

**Fig. S9.** The Tafel slope of 20% Pt/C, NiCoP, Ni<sub>2</sub>P, CoP, and Ni.

**Table S3.** Comparison HER performance of NiCoP with other electrocatalysts.

| Catalyst                                             | Current density (j)    | Overpotential I at the corresponding (j) | Electrolyte solution | Reference |
|------------------------------------------------------|------------------------|------------------------------------------|----------------------|-----------|
| NiCoP                                                | 10 mA/cm <sup>2</sup>  | 13.5 mV                                  | 1.0 M KOH            | This work |
| RhSe <sub>2</sub>                                    | 10 mA/cm <sup>2</sup>  | 81.6 mV                                  | 1.0 M KOH            | 13        |
| PS-MoNi@NF                                           | 10 mA/cm <sup>2</sup>  | 30 mV                                    | 1.0 M KOH            | 14        |
| Ni <sub>3</sub> N-Co <sub>3</sub> N PNAs/NF          | 10 mA/cm <sup>2</sup>  | 43 mV                                    | 1.0 M KOH            | 15        |
| Ni <sub>4</sub> Mo                                   | 100 mA/cm <sup>2</sup> | 86 mV                                    | 1.0 M KOH            | 16        |
| MoP/Mo <sub>2</sub> N                                | 10 mA/cm <sup>2</sup>  | 89 mV                                    | 1.0 M KOH            | 17        |
| NiP <sub>2</sub> -650(c/m)                           | 10 mA/cm <sup>2</sup>  | 134 mV                                   | 1.0 M KOH            | 18        |
| Cr-Ni                                                | 10 mA/cm <sup>2</sup>  | 203 mV                                   | 1.0 M KOH            | 19        |
| Ni <sub>2</sub> P-Cu <sub>3</sub> P                  | 10 mA/cm <sup>2</sup>  | 78 mV                                    | 1.0 M KOH            | 20        |
| PtNi <sub>5</sub> -0.3                               | 10 mA/cm <sup>2</sup>  | 26.8 mV                                  | 1.0 M KOH            | 21        |
| CuAlNiMoFe                                           | 100 mA/cm <sup>2</sup> | 56 mV                                    | 1.0 M KOH            | 22        |
| Co-N <sub>4</sub>                                    | 10 mA/cm <sup>2</sup>  | 66.7 mV                                  | 1.0 M KOH            | 23        |
| Ru@WNO-C                                             | 10 mA/cm <sup>2</sup>  | 24 mV                                    | 1.0 M KOH            | 24        |
| MoS <sub>2</sub> -MoP/NC,                            | 10 mA/cm <sup>2</sup>  | 35 mV                                    | 1.0 M KOH            | 25        |
| PHA-Mo <sub>2</sub> C                                | 10 mA/cm <sup>2</sup>  | 93 mV                                    | 1.0 M KOH            | 26        |
| Ni <sub>3</sub> N-V <sub>2</sub> O <sub>3</sub> -3-1 | 10 mA/cm <sup>2</sup>  | 57 mV                                    | 1.0 M KOH            | 27        |
| N-NiMoS                                              | 10 mA/cm <sup>2</sup>  | 68 mV                                    | 1.0 M KOH            | 28        |
| 2DPC-Ru                                              | 10 mA/cm <sup>2</sup>  | 24 mV                                    | 1.0 M KOH            | 29        |
| Ni-ReSe <sub>2</sub>                                 | 10 mA/cm <sup>2</sup>  | 109 mV                                   | 1.0 M KOH            | 30        |

**Table S4.** The exchange current densities of the catalysts for HER.

| Catalyst          | Exchange current density in acid solution (mA cm <sup>-2</sup> ) |
|-------------------|------------------------------------------------------------------|
| 20% Pt/C          | 6.25                                                             |
| NiCoP             | 2.82                                                             |
| CoP               | 2.69                                                             |
| Ni <sub>2</sub> P | 1.77                                                             |
| Ni                | 1.67                                                             |

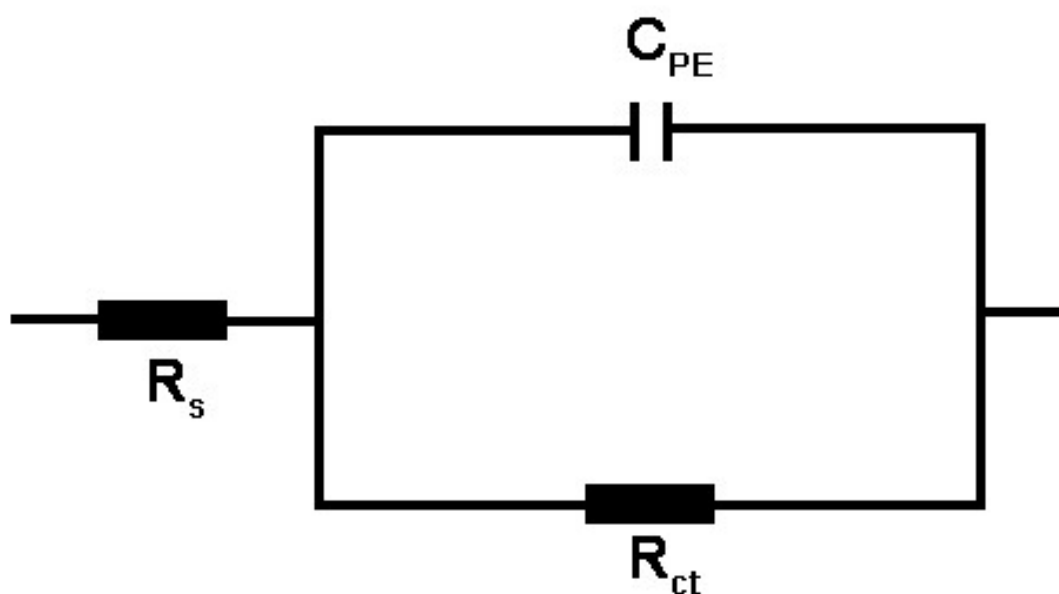

**Fig. S10.** The equivalent circuit of electrochemical impedance spectroscopy.

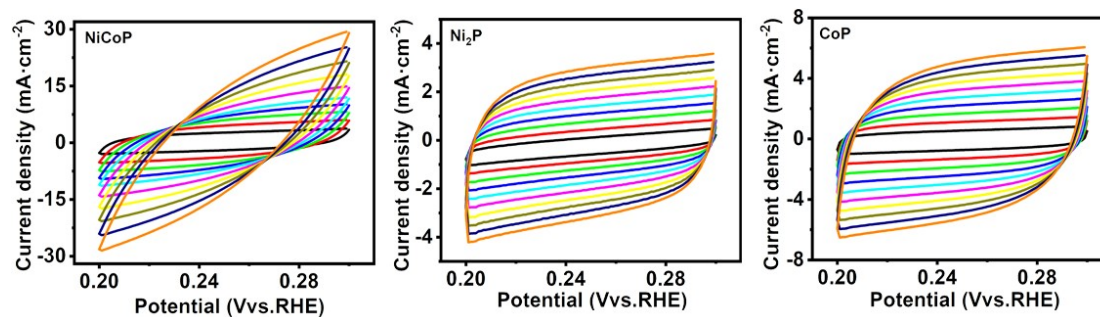

**Fig. S11.** The cyclic voltammety curves for NiCoP, Ni<sub>2</sub>P, and CoP with scanning rates from 20 to 200 mV s<sup>-1</sup>.



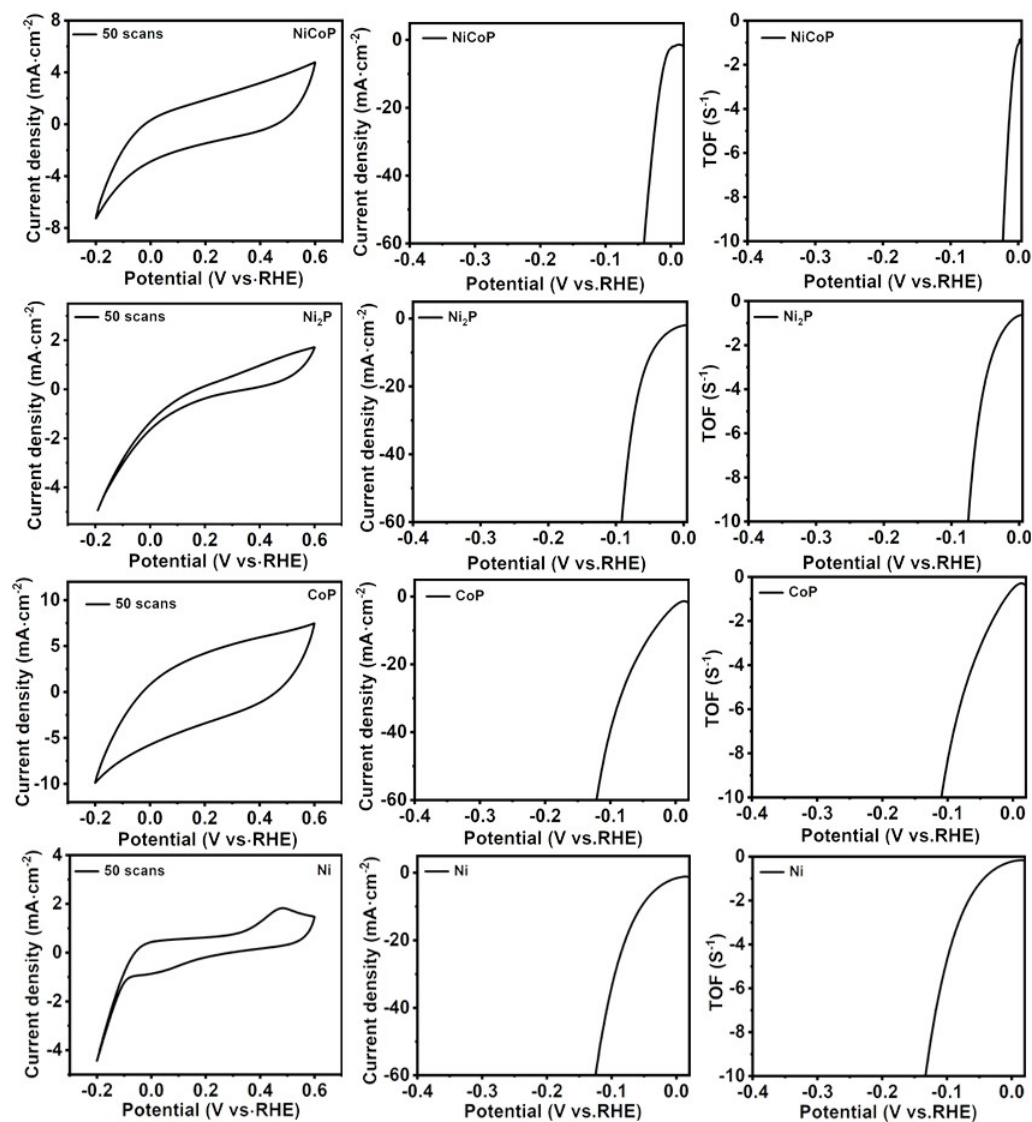

**Fig. S12** The cyclic voltammograms in the region of  $-0.2$  to  $0.6$  V vs. RHE for NiCoP, Ni<sub>2</sub>P, CoP, and Ni at pH = 7.0 with a scan rate  $50 \text{ mV s}^{-1}$ . Polarization curves of NiCoP, Ni<sub>2</sub>P, CoP at pH = 1.0 with a scan rate of  $5 \text{ mV s}^{-1}$ . (c) Calculated TOFs for NiCoP, Ni<sub>2</sub>P, CoP at pH = 1.0.

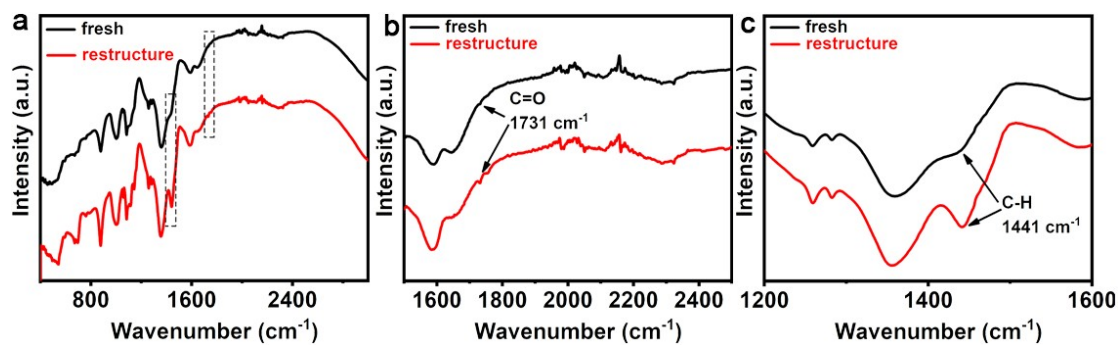

**Fig. S13** (a) Adsorption infrared spectra of HMF before and after catalyst reconstruction. (b) and (c) Partial enlargement of infrared spectrum.

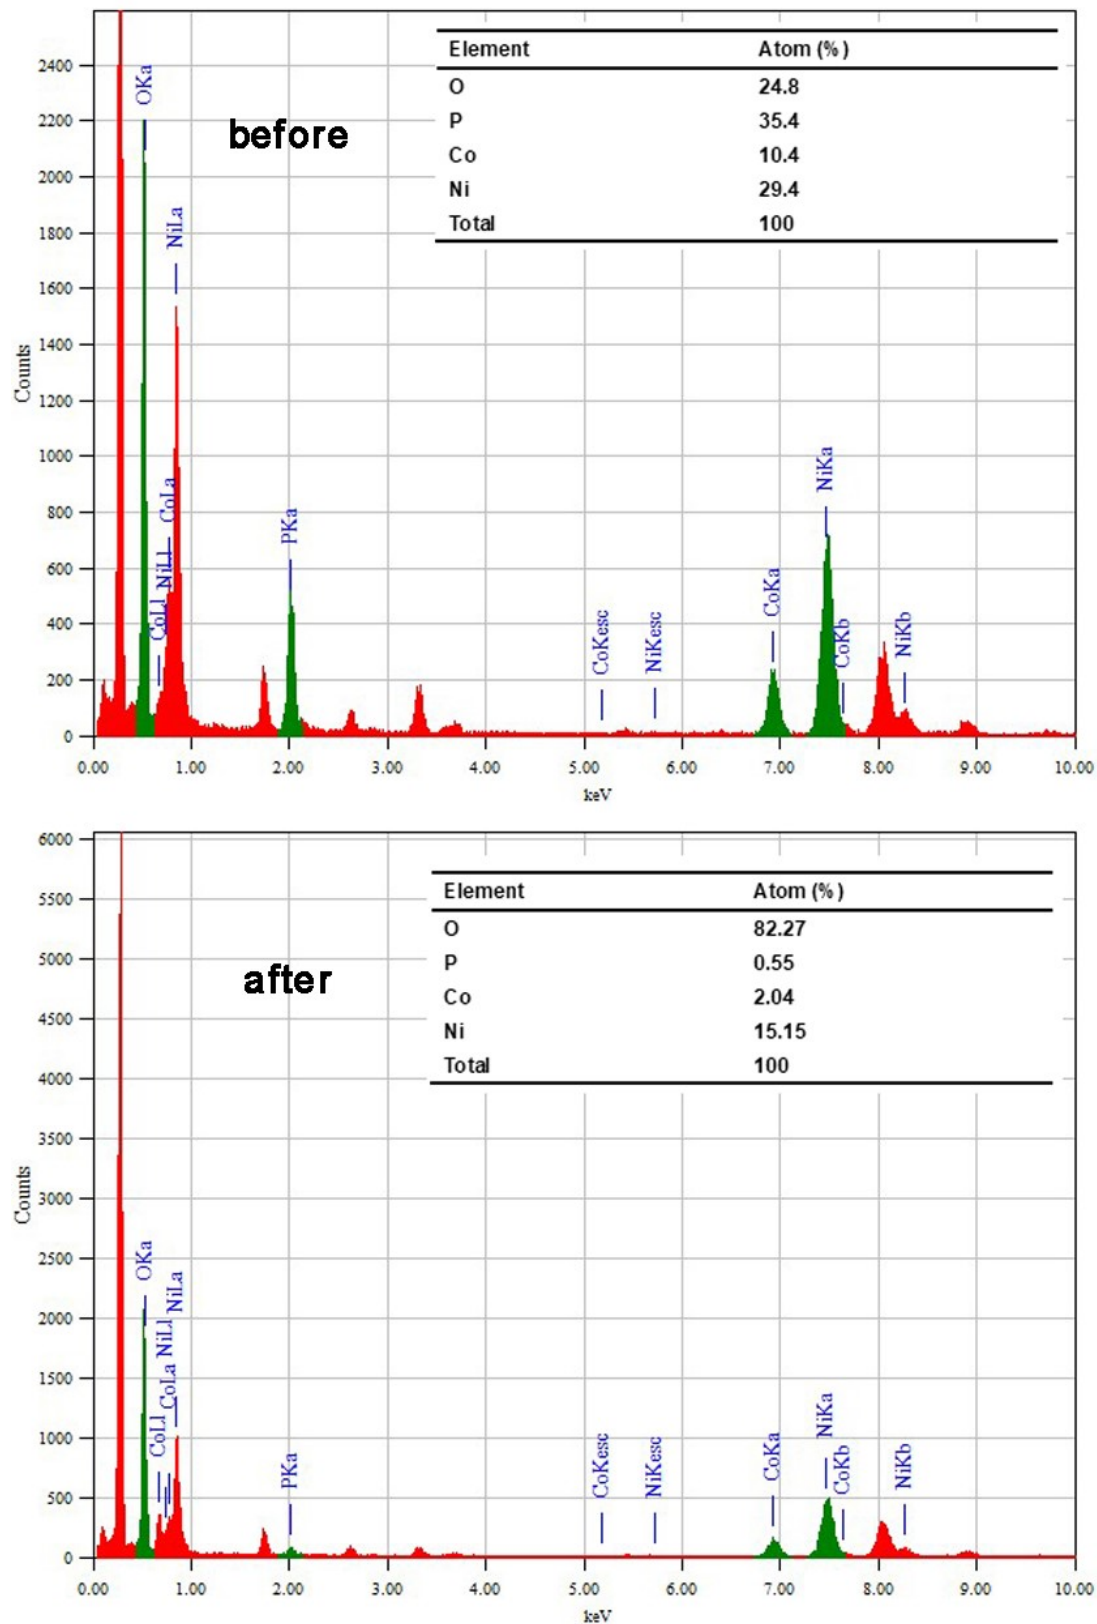

Fig. S14 The EDS elemental content of catalysts before and after HMFOR.

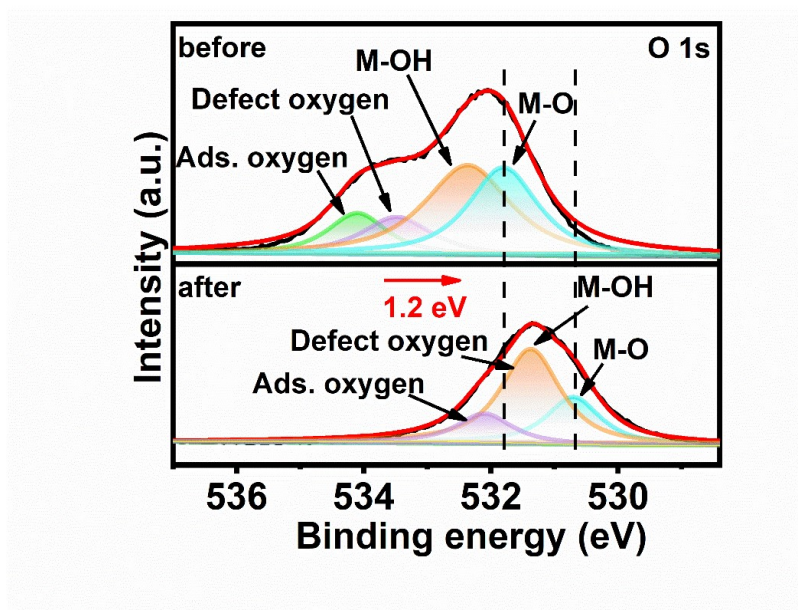

Fig. S15 The XPS spectra of O 1s in the NiCoP before and after HMFOR.

Table S5. The surface element content of NiCoP before and after HMFOR was measured by XPS.

| Condition | elements | Atomic (%) |
|-----------|----------|------------|
| before    | C 1s     | 7.25       |
|           | O 1s     | 58.93      |
|           | Co 2p    | 3.7        |
|           | Ni 2p    | 7.59       |
|           | P 2p     | 22.52      |
| after     | C 1s     | 9.45       |
|           | O 1s     | 59.21      |
|           | Co 2p    | 6.71       |
|           | Ni 2p    | 19         |
|           | P 2p     | 5.63       |

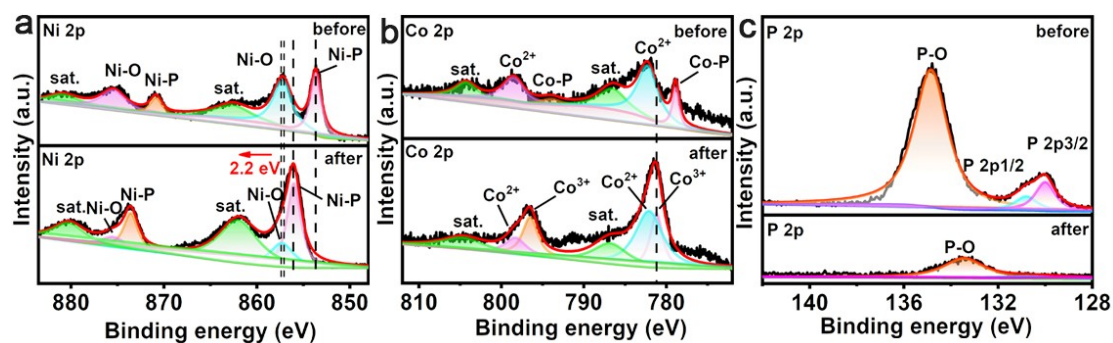

Fig. S16 The XPS analysis of the NiCoP before and after the HMFOR test.

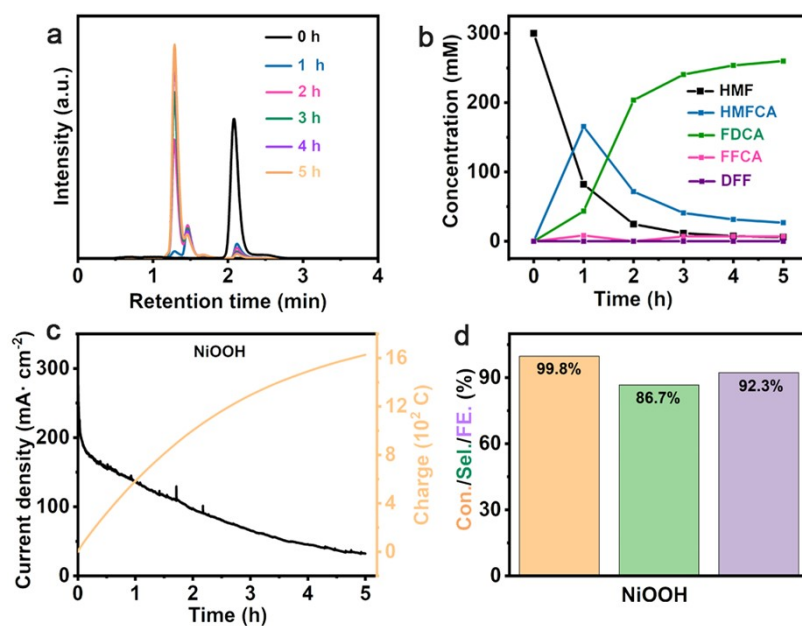

**Fig. S17.** (a) The chromatogram of HMF electrooxidation catalyzed by NiOOH. (b) Concentration change curves with the progress of reaction for the products during the HMFOR process. (c) I-t curve of NiOOH at a constant potential of 1.464 V via passing the charge of 1627.6 C. (d) HMF conversion, FDCA selectivity, and Faraday efficiency of NiOOH.

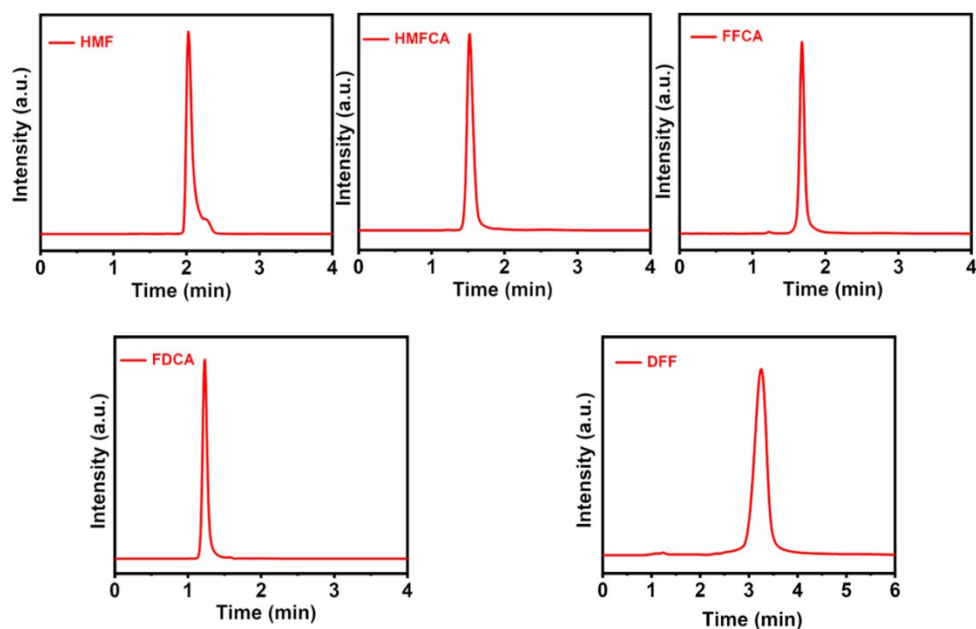

**Fig. S18** The HPLC measurements of pure HMF, HMFCFA, FFCA, FDCA, and DFF.



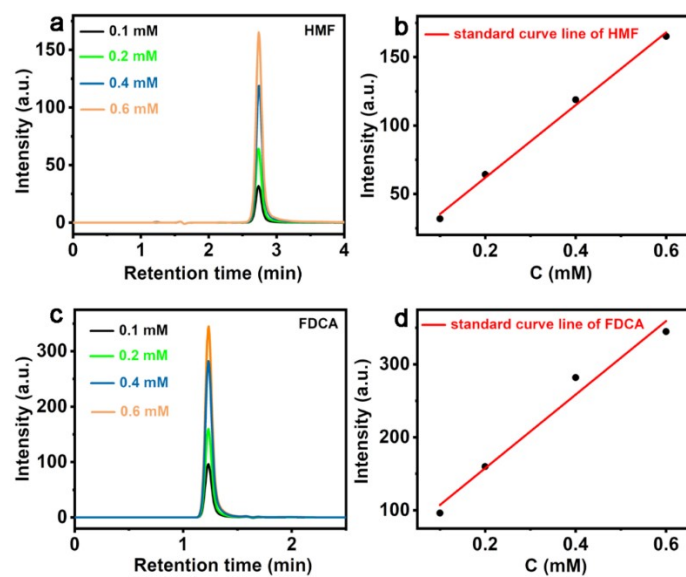

Fig. S19 Calibration curves of the HPLC for HMF and FDCA.

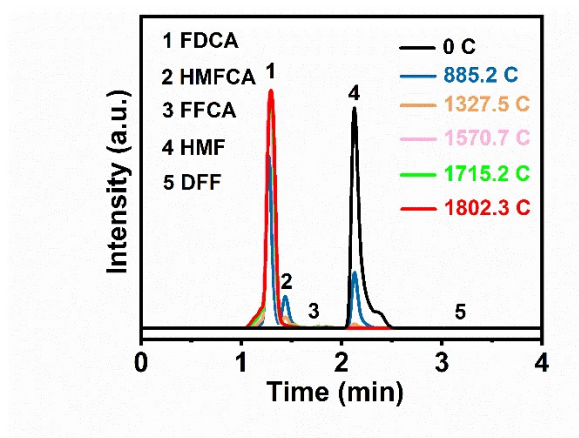

Fig. S20 The chromatogram of HMF electrooxidation catalyzed by NiCoP at 1.464 V in 10 mL 1.0 M KOH with 300 mM HMF.

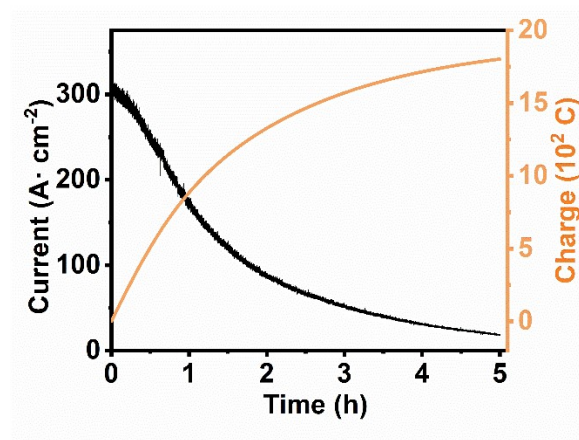

Fig. S21 I-t curve of NiCoP at a constant potential of 1.464 V in 1.0 M KOH with 300 mM HMF via passing the charge of 1802.3 C.

**Table S6.** The concentration of each substance changed with reaction time.

| Substances | Reaction time (h) | Concentration (mM) |
|------------|-------------------|--------------------|
| HMF        | 0                 | 300                |
|            | 1                 | 70.32              |
|            | 2                 | 4.86               |
|            | 3                 | 0.99               |
|            | 4                 | 0.39               |
|            | 5                 | 0.3                |
| FDCA       | 0                 | 0                  |
|            | 1                 | 189.13             |
|            | 2                 | 288.01             |
|            | 3                 | 298.42             |
|            | 4                 | 298.83             |
|            | 5                 | 299.44             |
| HMFCa      | 0                 | 0                  |
|            | 1                 | 39.59              |
|            | 2                 | 6.81               |
|            | 3                 | 0.04               |
|            | 4                 | 0.39               |
|            | 5                 | 0.14               |
| FFCA       | 0                 | 0                  |
|            | 1                 | 0.96               |
|            | 2                 | 0.32               |
|            | 3                 | 0.55               |
|            | 4                 | 0.39               |
|            | 5                 | 0.12               |
| DFF        | 0                 | 0                  |
|            | 1                 | 0                  |
|            | 2                 | 0                  |
|            | 3                 | 0                  |
|            | 4                 | 0                  |
|            | 5                 | 0                  |

**Table S7.** Comparison of conversion, selectivity, and Faraday efficiency for as-prepared samples.

| Substances        | Conversion rate (%) | Selectivity (%) | Faraday efficiency (%) |
|-------------------|---------------------|-----------------|------------------------|
| NiCoP             | 99.8                | 99.6            | 96.1                   |
| Ni <sub>2</sub> P | 98.8                | 92.4            | 90.9                   |
| CoP               | 98                  | 91.3            | 79.1                   |

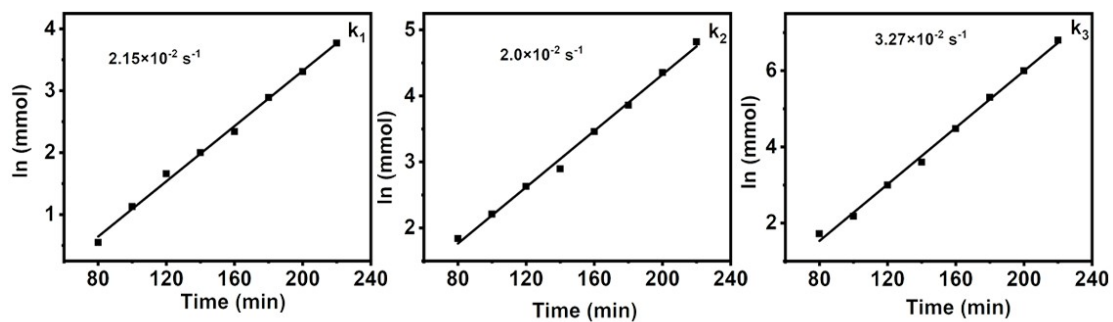

Fig. S22 Estimation of rate constants for each product.

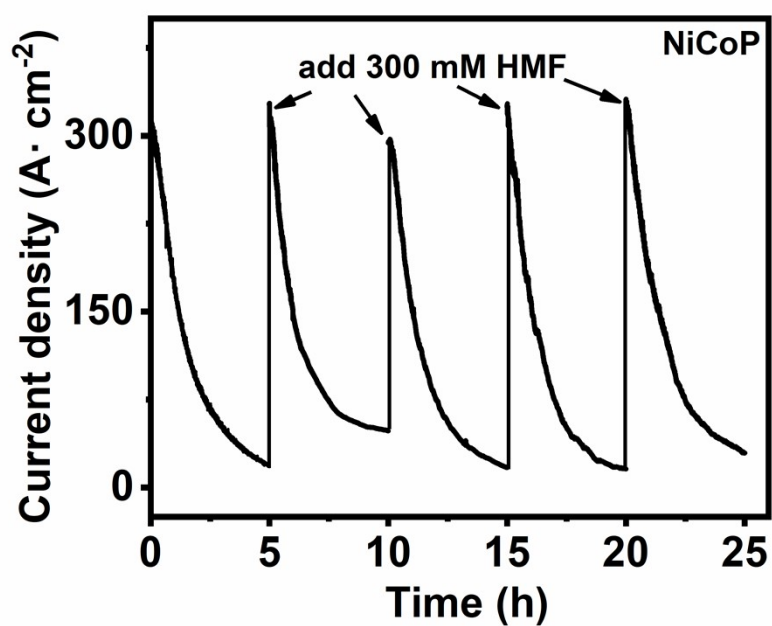

Fig. S23 I-t curve of NiCoP at 1.464 V with the intermittent addition of 300 mM HMF.

Table S8. Various substances analysis five successive cycles HMFOR for NiCoP.

| Cycles | Conversion rate (%) | Selectivity (%) | Faraday efficiency (%) |
|--------|---------------------|-----------------|------------------------|
| 1      | 99.8                | 99.2            | 95.6                   |
| 2      | 99.8                | 99.1            | 92.9                   |
| 3      | 99.8                | 99.1            | 95.5                   |
| 4      | 99.8                | 99.1            | 95.7                   |
| 5      | 99.8                | 99.2            | 93.5                   |

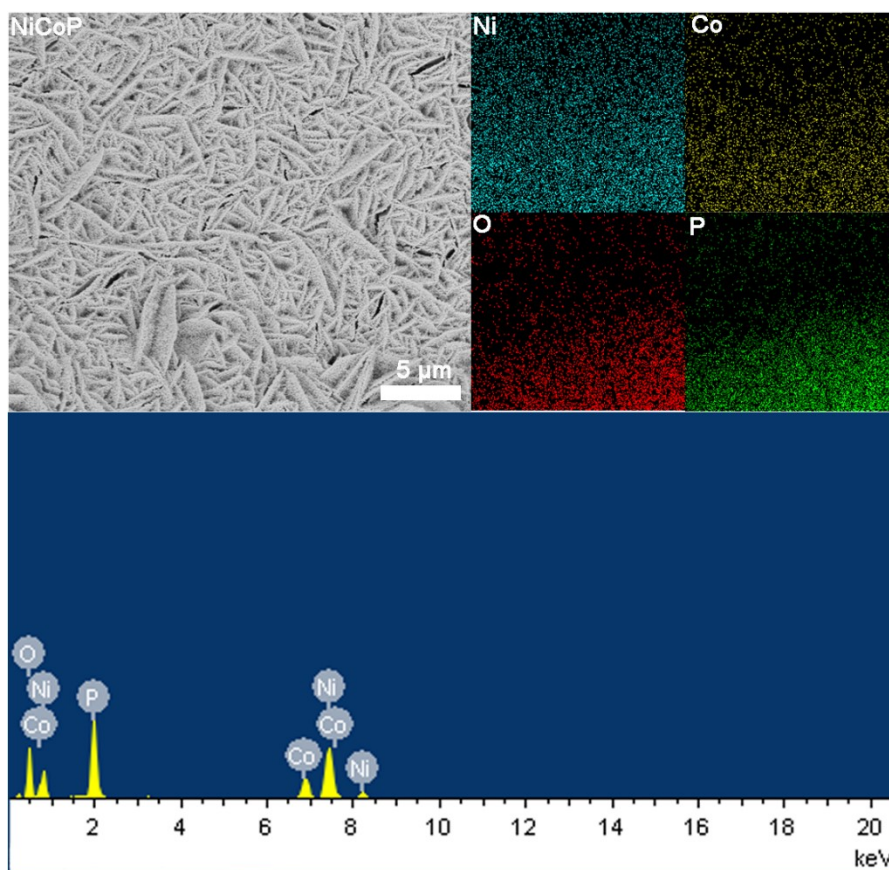

**Fig. S24** The SEM image elements mapping and EDS of NiCoP after HMFOR.

**Table S9.** The mass percentage and atomic percentage of elements in NiCoP catalyst after HMFOR.

| Elements | Mass ratio | Atomic |
|----------|------------|--------|
| O        | 24.55      | 51.86  |
| P        | 7.13       | 7.78   |
| Co       | 16.28      | 9.34   |
| Ni       | 52.04      | 31.02  |
| Total    | 100        |        |

**Table. S10** Conversion, selectivity, and Faraday efficiency of NiCoP coupled flow-through reactor at different flow rates.

| Flow rate (mL/min) | Conversion rate (%) | Selectivity (%) | Faraday efficiency (%) |
|--------------------|---------------------|-----------------|------------------------|
| 0.05               | 99.9                | 98.9            | 95.4                   |
| 0.1                | 99.9                | 98.6            | 95.1                   |
| 0.15               | 98.7                | 98.8            | 94.2                   |
| 0.2                | 98.2                | 90.7            | 86                     |
| 0.3                | 97.3                | 87.9            | 82.6                   |
| 0.4                | 97                  | 87.1            | 81.6                   |



**Table. S11** Conversion, selectivity, and Faraday efficiency of NiCoP coupled flow-by reactor at different flow rates.

| Flow rate (mL/min) | Conversion rate (%) | Selectivity (%) | Faraday efficiency (%) |
|--------------------|---------------------|-----------------|------------------------|
| 0.05               | 99.8                | 99.7            | 96.8                   |
| 0.1                | 97.7                | 99              | 94.1                   |
| 0.15               | 96.9                | 91.7            | 86.4                   |
| 0.2                | 96.4                | 82.9            | 82.4                   |
| 0.3                | 96.2                | 86              | 80.5                   |

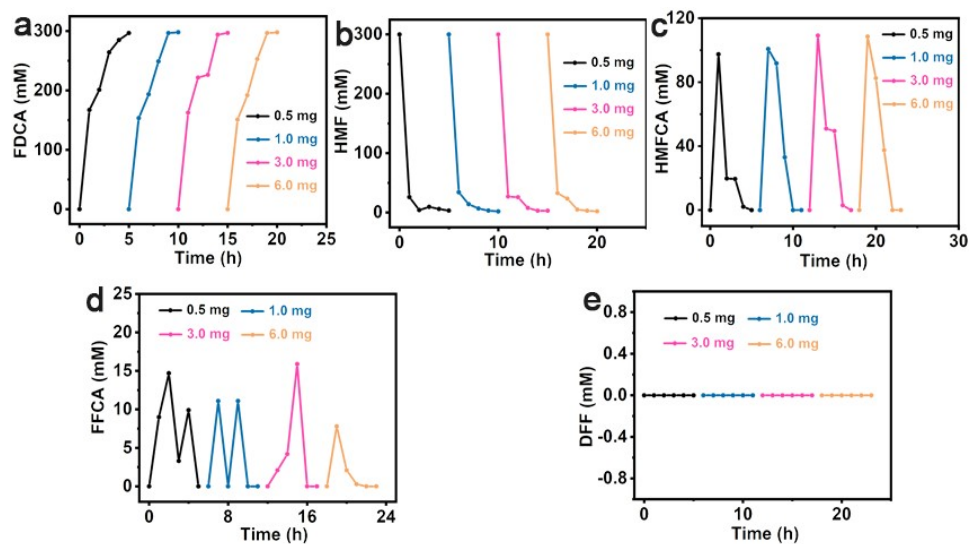

**Fig. S25** (a) The effects of different P content in electrolyte on the detection of FDCA, (b) HMF, (c) HMFCFA, (d) FFCA and DFF.

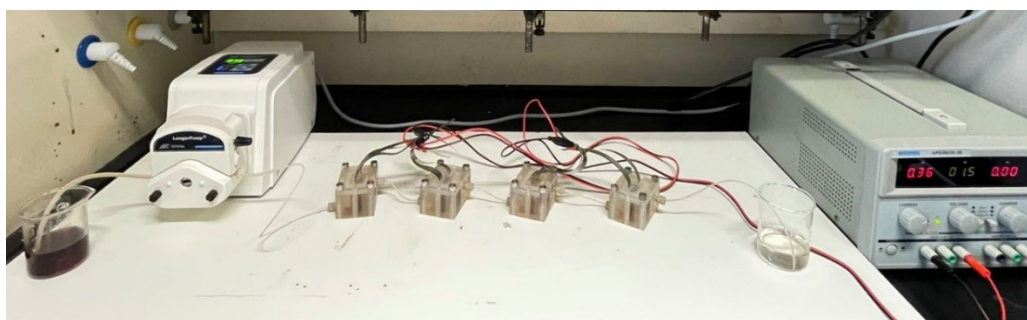

**Fig. S26** Evaluation of STY in a flow-through reactor under 1.464 V constant voltage.

**Table. S12** Conversion, selectivity, and Faraday efficiency of NiCoP coupled flow- through reactor for ten times.

| <b>Cycles</b> | <b>Conversion rate (%)</b> | <b>Selectivity (%)</b> | <b>Faraday efficiency (%)</b> |
|---------------|----------------------------|------------------------|-------------------------------|
| 1             | 99.9                       | 98.9                   | 94.2                          |
| 2             | 99.9                       | 98.9                   | 94.2                          |
| 3             | 99.9                       | 97.8                   | 93.1                          |
| 4             | 99.9                       | 97.3                   | 93                            |
| 5             | 99.9                       | 97.3                   | 92.6                          |
| 6             | 99.9                       | 97.4                   | 92.6                          |
| 7             | 99.9                       | 97                     | 92.4                          |
| 8             | 99.9                       | 97                     | 92.4                          |
| 9             | 99.9                       | 97                     | 92.4                          |
| 10            | 99.9                       | 97                     | 92.4                          |

## Notes and references

- 1 B. J. Taitt, D. H. Nam, K. S. Choi, *ACS Catal.*, 2018, **9**, 660-670.
- 2 G. Yang, Y. Jiao, H. Yan, Y. Xie, A. Wu, X. Dong, D. Guo, C. Tian, H. Fu, *Adv. Mater.*, 2020, **32**, 2000455.
- 3 L. Gao, Z. Liu, J. Ma, L. Zhong, Z. Song, J. Xu, S. Gan, D. Han, L. Niu, *Appl. Catal. B-Environ.*, 2020, **261**, 118235.
- 4 N. Zhang, Y. Zou, L. Tao, W. Chen, L. Zhou, Z. Liu, B. Zhou, G. Huang, H. Lin, S. Wang, *Angew. Chem., Int. Ed.*, 2019, **58**, 15895-15903.
- 5 N. Jiang, B. You, R. Boonstra, I. M. Terrero Rodriguez, Y. Sun, *ACS Energy Lett.*, 2016, **1**, 386-390.
- 6 M. J. Kang, H. Park, J. Jegal, S. Y. Hwang, Y. S. Kang, H. G. Cha, *Appl. Catal. B-Environ.*, 2019, **242**, 85-91.
- 7 S. Li, X. Sun, Z. Yao, X. Zhong, Y. Cao, Y. Liang, Z. Wei, S. Deng, G. Zhuang, X. Li, J. Wang, *Adv. Funct. Mater.*, 2019, **29**, 1904780.
- 8 Y. Peng, W. Pan, N. Wang, J. E. Lu, S. Chen, *ChemSusChem.*, 2018, **11**, 130-136.
- 9 Y. Lu, C. L. Dong, Y. C. Huang, Y. Zou, Z. Liu, Y. Liu, Y. Li, N. He, J. Shi, S. Wang, *Angew. Chem., Int. Ed.*, 2020, **59**, 19215-19221.
- 10 M. Zhang, Y. Liu, B. Liu, Z. Chen, H. Xu, K. Yan, *ACS Catal.*, 2020, **10**, 5179-5189.
- 11 I. van Scodeller, K. De Oliveira Vigier, E. Muller, C. Ma, F. Guegan, R. Wischert, F. Jerome, *ChemSusChem*, 2021, **14**, 313-323.
- 12 M. Park, M. Gu, B. S. Kim, *ACS Nano*, 2020, **14**, 6812-6822.

- 13 W. Zhong, B. Xiao, Z. Lin, Z. Wang, L. Huang, S. Shen, Q. Zhang, L. Gu, *Adv. Mater.*, 2021, **33**, 2007894.
- 14 J. Song, Y. Q. Jin, L. Zhang, P. Dong, J. Li, F. Xie, H. Zhang, J. Chen, Y. Jin, H. Meng, X. Sun, *Adv. Energy Mater.*, 2021, **11**, 2003511.
- 15 Q. Qian, J. Zhang, J. Li, Y. Li, X. Jin, Y. Zhu, Y. Liu, Z. Li, A. El-Harairy, C. Xiao, G. Zhang, Y. Xie, *Angew. Chem., Int. Ed.*, 2021, **60**, 5984-5993.
- 16 W. Du, Y. Shi, W. Zhou, Y. Yu, B. Zhang, *Angew. Chem., Int. Ed.*, 2021, **60**, 7051-7055.
- 17 Y. Gu, A. Wu, Y. Jiao, H. Zheng, X. Wang, Y. Xie, L. Wang, C. Tian, H. Fu, *Angew. Chem., Int. Ed.*, 2021, **60**, 6673-6681.
- 18 Q. Fu, X. Wang, J. Han, J. Zhong, T. Zhang, T. Yao, C. Xu, T. Gao, S. Xi, C. Liang, L. Xu, P. Xu, B. Song, *Angew. Chem., Int. Ed.*, 2021, **60**, 259-267.
- 19 J. Kim, H. Jung, S. M. Jung, J. Hwang, D. Y. Kim, N. Lee, K. S. Kim, H. Kwon, Y. T. Kim, J. W. Han, J. K. Kim, *J. Am. Chem. Soc.*, 2021, **143**, 1399-1408.
- 20 L. Yu, J. Zhang, Y. Dang, J. He, Z. Tobin, P. Kerns, Y. Dou, Y. Jiang, Y. He, S. L. Suib, *ACS Catal*, 2019, **9**, 6919-6928.
- 21 C. Zhang, X. Liang, R. Xu, C. Dai, B. Wu, G. Yu, B. Chen, X. Wang, N. Liu, *Adv. Funct. Mater.*, 2021, **31**, 2008298.
- 22 R. Q. Yao, Y. T. Zhou, H. Shi, W. B. Wan, Q. H. Zhang, L. Gu, Y. F. Zhu, Z. Wen, X. Y. Lang, Q. Jiang, *Adv. Funct. Mater.*, 2020, **31**, 2009613.
- 23 P. Sabhapathy, I. Shown, A. Sabbah, P. Raghunath, J. L. Chen, W. F. Chen, M. C. Lin, K. H. Chen, L. C. Chen, *Nano Energy*, 2021, **80**, 105544.



- 24 G. Meng, H. Tian, L. Peng, Z. Ma, Y. Chen, C. Chen, Z. Chang, X. Cui, J. Shi, *Nano Energy*, 2021, **80**, 105531.
- 25 X. Huang, H. Xu, D. Cao, D. Cheng, *Nano Energy*, 2020, **78**, 105253.
- 26 L. Zhao, H. Yuan, D. Sun, J. Jia, J. Yu, X. Zhang, X. Liu, H. Liu, W. Zhou, *Nano Energy*, 2020, **77**, 105056.
- 27 P. Zhou, G. Zhai, X. Lv, Y. Liu, Z. Wang, P. Wang, Z. Zheng, H. Cheng, Y. Dai, B. Huang, *Appl. Catal. B-Environ.*, 2021, **283**, 119590.
- 28 C. Huang, L. Yu, W. Zhang, Q. Xiao, J. Zhou, Y. Zhang, P. An, J. Zhang, Y. Yu, *Appl. Catal. B-Environ.*, 2020, **276**, 119137.
- 29 K. Tu, D. Tranca, F. Rodriguez-Hernandez, K. Jiang, S. Huang, Q. Zheng, M.X. Chen, C. Lu, Y. Su, Z. Chen, H. Mao, C. Yang, J. Jiang, H. W. Liang, X. Zhuang, *Adv. Mater.*, 2020, **32**, 2005433.
- 30 I. S. Kwon, I. H. Kwak, S. Ju, S. Kang, S. Han, Y. C. Park, J. Park, J. Park, *ACS Nano*, 2020, **14**, 12184-12194.
